# Supplementary material
Source: MDPI journal article supplement (https://www.mdpi.com/2313-0105/8/2/10)
Supplement: s1 [file s1]

# Supporting Information

## Raman Diagnostics of Cathode Materials for Li-Ion Batteries Using Multi-Wavelength Excitation

Marcel Heber, Kathrin Hofmann and Christian Hess \*

Eduard-Zintl-Institute for Inorganic and Physical Chemistry, Technical University of Darmstadt,

Alarich-Weiss-Str. 8, 64287 Darmstadt, Germany; Marcel.Heber@web.de (M.H.); kathrin.hofmann@tu-darmstadt.de (K.H.)

\* Correspondence: christian.hess@tu-darmstadt.de; Tel.: +49-6151-16-21975; Fax: +49-6151-16-21979

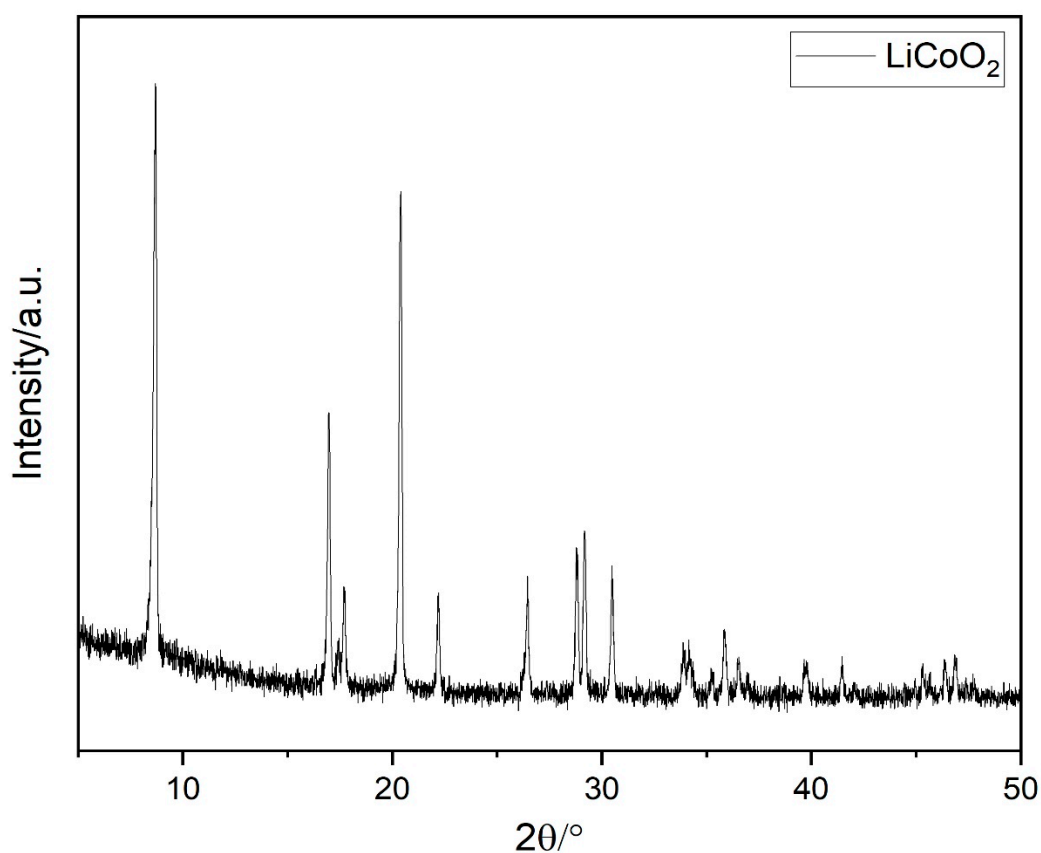

**Figure S1.** XRD results (Mo  $K_{\alpha 1}$ ) of the prepared  $\text{LiCoO}_2$ . The refined  $a$  and  $c$  parameters are 2.8147(2) Å and 14.0437(9) Å, respectively.

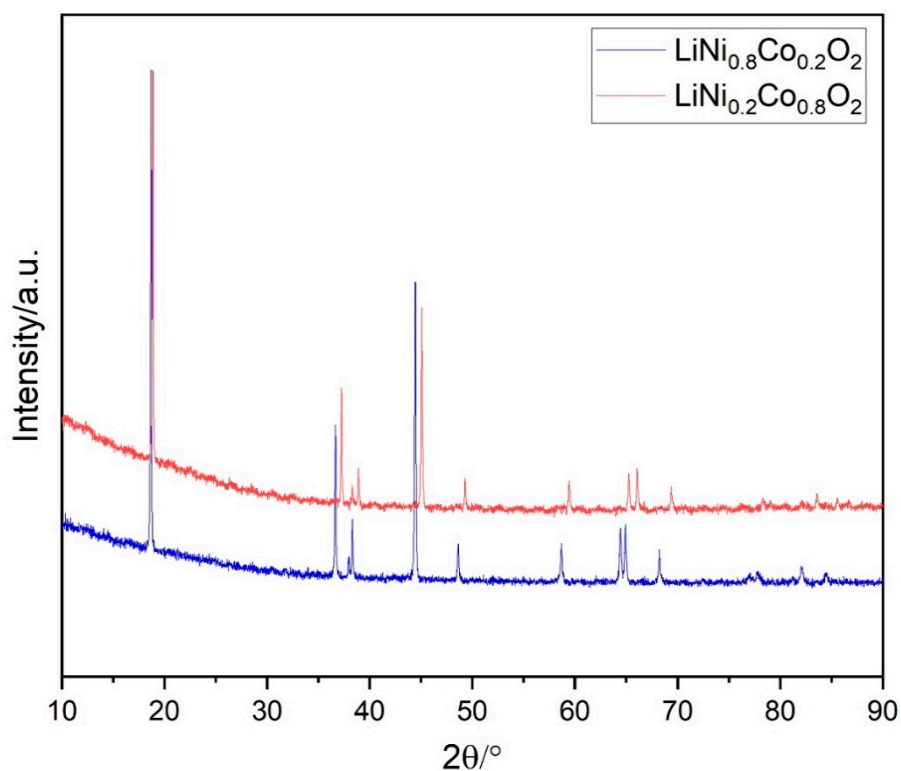

**Figure S2.** XRD results (Cu  $K\alpha_1$ ) of the prepared  $\text{LiNi}_{0.2}\text{Co}_{0.8}\text{O}_2$  (red) and  $\text{LiNi}_{0.8}\text{Co}_{0.2}\text{O}_2$  (blue). The refined  $a$  and  $c$  parameters of  $\text{LiNi}_{0.2}\text{Co}_{0.8}\text{O}_2$  are 2.83369(5) Å and 14.01716(7) Å, and those of  $\text{LiNi}_{0.8}\text{Co}_{0.2}\text{O}_2$  are 2.86810(6) Å and 14.1952(7) Å, respectively.

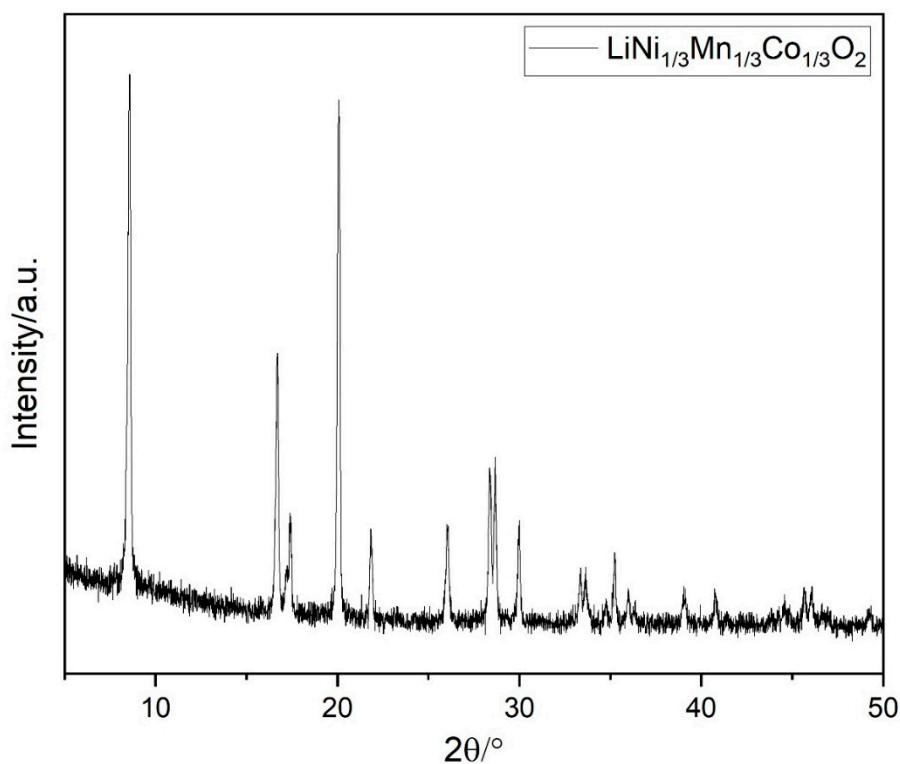

**Figure S3.** XRD results (Cu  $K\alpha_1$ ) of the prepared  $\text{LiNi}_{0.2}\text{Co}_{0.8}\text{O}_2$  (red) and  $\text{LiNi}_{0.8}\text{Co}_{0.2}\text{O}_2$  (blue). The refined  $a$  and  $c$  parameters of  $\text{LiNi}_{0.2}\text{Co}_{0.8}\text{O}_2$  are 2.83369(5) Å and 14.01716(7) Å, and those of  $\text{LiNi}_{0.8}\text{Co}_{0.2}\text{O}_2$  are 2.86810(6) Å and 14.1952(7) Å, respectively.

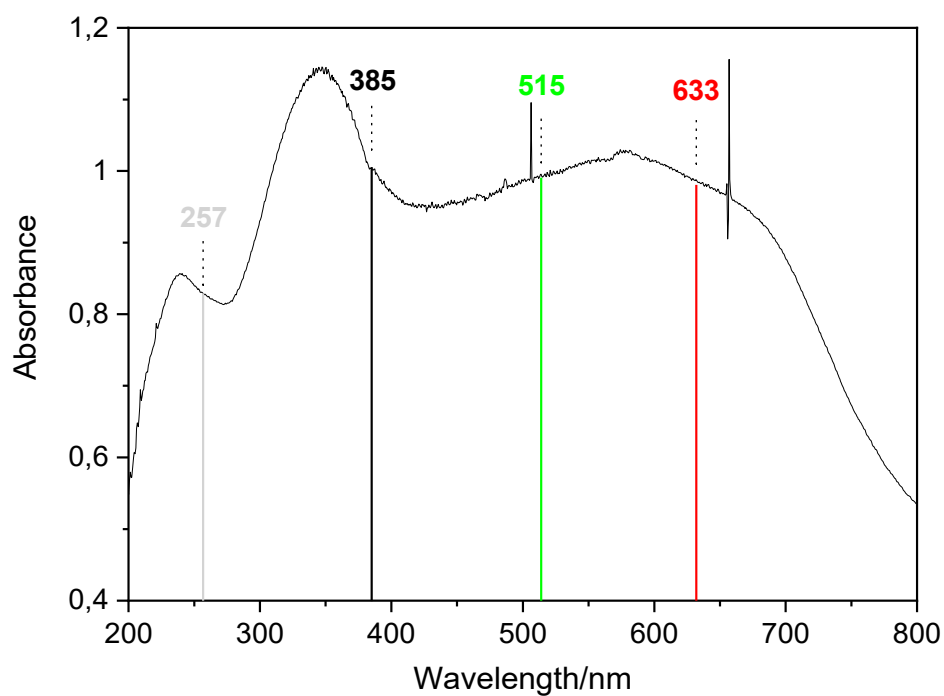

**Figure S4.** UV-Vis spectrum of LiCoO<sub>2</sub> together with the used excitation wavelengths (257, 385, 515, and 633 nm).

**Table S1.** Direct products for point group D<sub>3d</sub> leading to Raman-active modes.

|                 | A <sub>1g</sub> | A <sub>2g</sub> | E <sub>g</sub>                                     | A <sub>1u</sub> | A <sub>2u</sub> | E <sub>u</sub>                                     |
|-----------------|-----------------|-----------------|----------------------------------------------------|-----------------|-----------------|----------------------------------------------------|
| A <sub>1g</sub> | A <sub>1g</sub> |                 | E <sub>g</sub>                                     |                 |                 |                                                    |
| A <sub>2g</sub> |                 | A <sub>1g</sub> | E <sub>g</sub>                                     |                 |                 |                                                    |
| E <sub>g</sub>  | E <sub>g</sub>  | E <sub>g</sub>  | A <sub>1g</sub> ⊕ A <sub>2g</sub> ⊕ E <sub>g</sub> |                 |                 |                                                    |
| A <sub>1u</sub> |                 |                 |                                                    | A <sub>1g</sub> |                 | E <sub>g</sub>                                     |
| A <sub>2u</sub> |                 |                 |                                                    |                 | A <sub>1g</sub> | E <sub>g</sub>                                     |
| E <sub>u</sub>  |                 |                 |                                                    | E <sub>g</sub>  | E <sub>g</sub>  | A <sub>1g</sub> ⊕ A <sub>2g</sub> ⊕ E <sub>g</sub> |

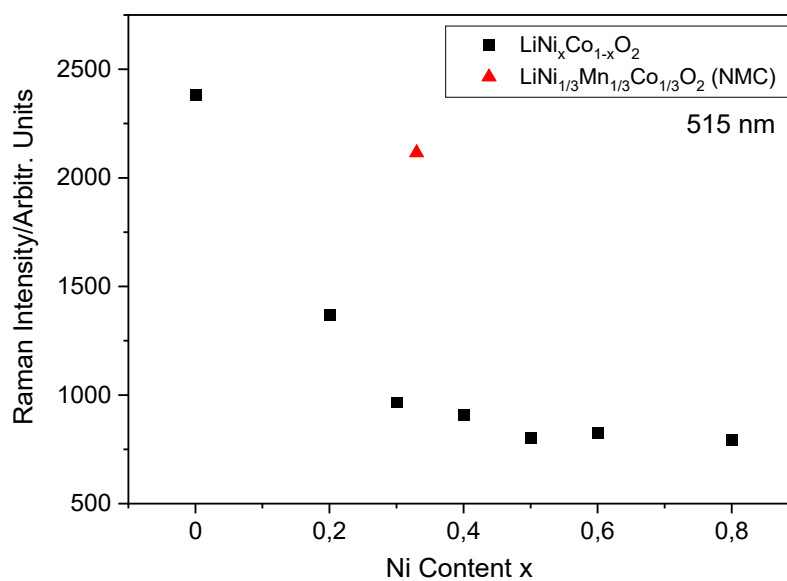

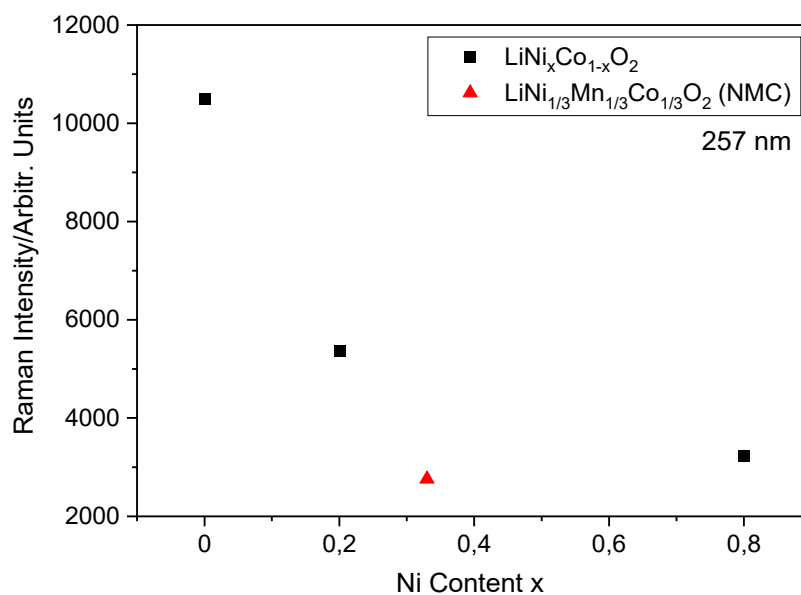

**Figure S5.** Raman intensity of the  $A_{1g}$  mode of  $\text{LiCoO}_2$ ,  $\text{LiNi}_x\text{Co}_{1-x}\text{O}_2$  and  $\text{LiNi}_{1/3}\text{Mn}_{1/3}\text{Co}_{1/3}\text{O}_2$  (NMC) as a function of the Nickel content  $x$  for 515 nm (top) und 257 nm (bottom) excitation.

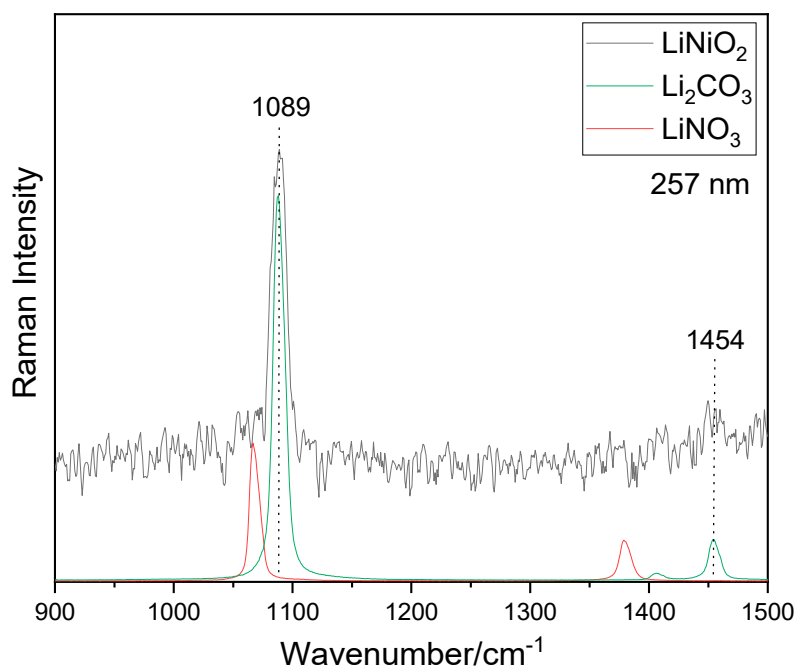

**Figure S6.** Raman spectra of  $\text{LiNiO}_2$  and reference compounds at 257 nm excitation. Spectra were offset for clarity.
